# Supplementary material for: Microplastics dampen the self-renewal of hematopoietic stem cells by disrupting the gut microbiota-hypoxanthine-Wnt axis
Source: PubMed Central journal article supplement (PMC10978833; doi:10.1038/s41421-024-00665-0), 2024-03-29
Supplement: 41421_2024_665_MOESM9_ESM.pdf [file 41421_2024_665_MOESM9_ESM.pdf]

## Supplementary Fig. S2

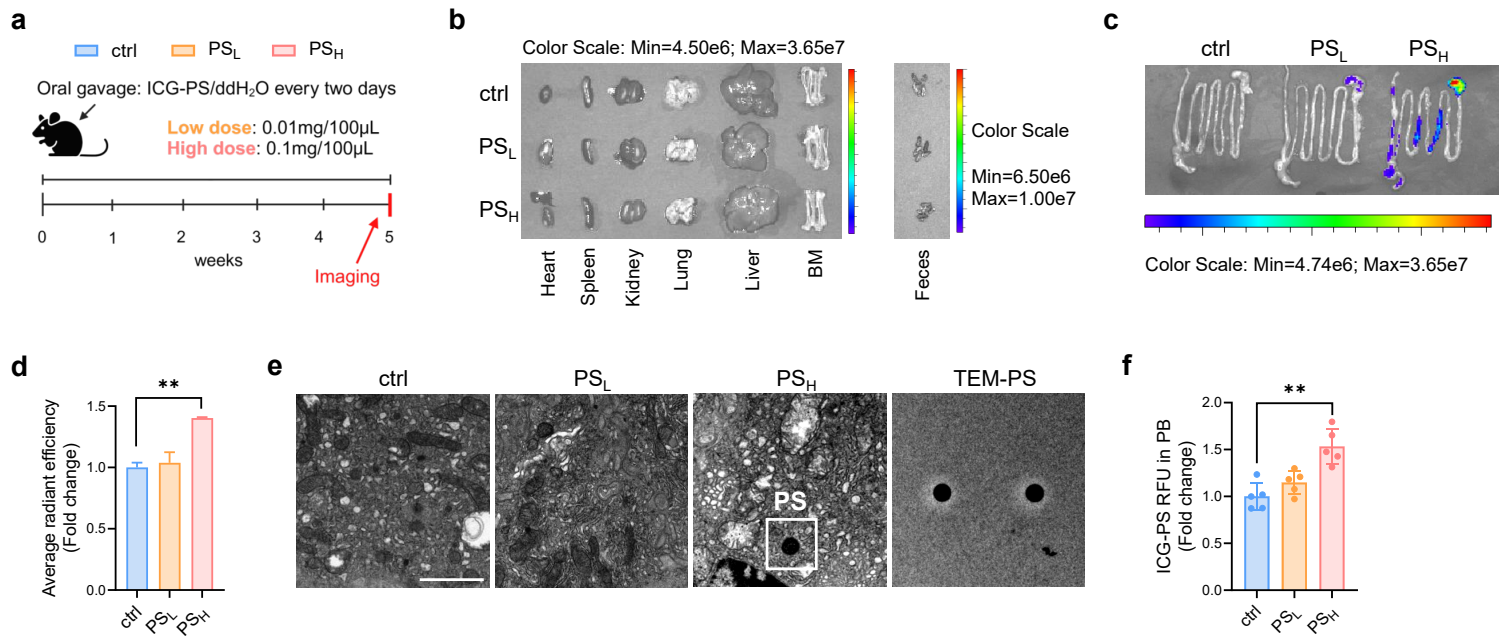

### Supplementary Fig. S2 | Distribution of microplastics *in vivo*.

**a**, Schematic outlining mouse model for ICG-PS treatment. **b**, Distribution of ICG-PS in main tissues and feces after 5 weeks gavage. Color scale: Min=4.50e6; Max=3.65e7 (left); Min=6e6; Max=1e7 (right). **c**, Distribution of ICG-PS in gastrointestinal tissues after 5 weeks gavage. Color scale: Min=4.74e6; Max=3.65e7. **d**, Average radiant efficiency of ICG-PS. **e**, Representative transmission electron microscope (TEM) images of intestinal cell and ICG-PS. Scale bar, 2µm (n ≥ 3 per group). **f**, Body weight of each mouse of the three groups. The data are shown as the mean ± SD. Unpaired two-tailed t-test, \* $P < 0.05$ , \*\* $P < 0.01$ .
