# Supplementary material for: Microplastics dampen the self-renewal of hematopoietic stem cells by disrupting the gut microbiota-hypoxanthine-Wnt axis
Source: PubMed Central journal article supplement (PMC10978833; doi:10.1038/s41421-024-00665-0), 2024-03-29
Supplement: 41421_2024_665_MOESM14_ESM.pdf [file 41421_2024_665_MOESM14_ESM.pdf]

# Supplementary Fig. S7

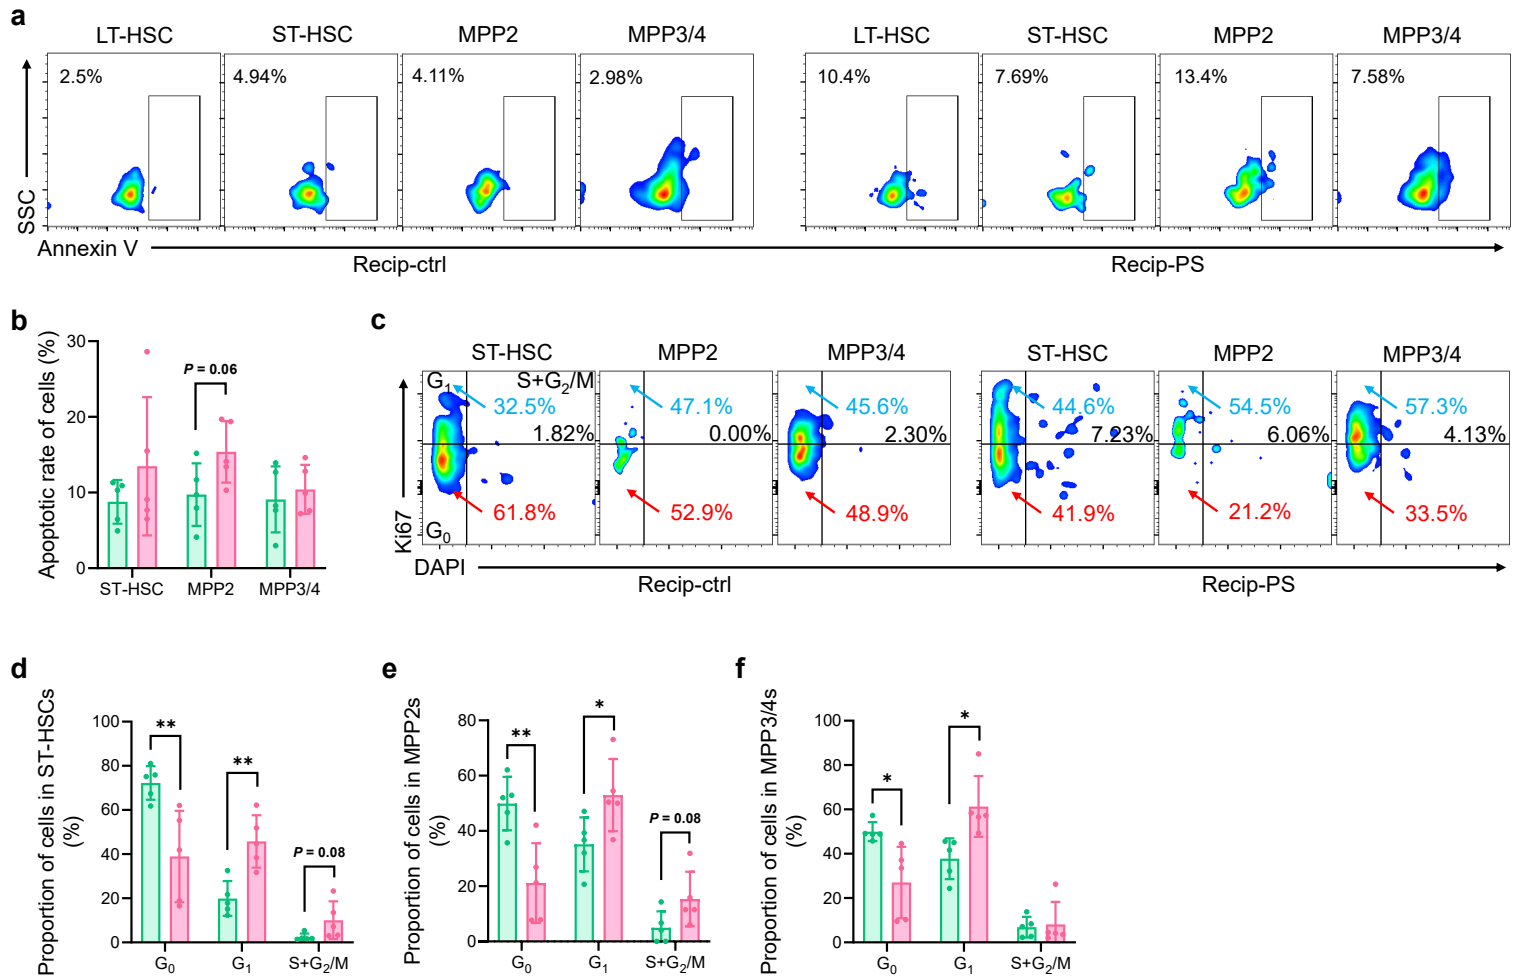

## Supplementary Fig. S7 | Hematopoietic stem and progenitor cells are damaged in Recip-PS group after FMT.

**a-b**, Representative flow cytometry plots (**a**) and proportion of apoptotic rate in HSPCs (**b**) ( $n = 5$  per group). **c**, Representative flow cytometry plots of cell cycle in HSPCs. **d-f**, Proportion of cells in individual cycle phases of ST-HSCs (**d**), MPP2s (**e**) and MPP3/4s (**f**). Error bars indicate SD, unpaired two-tailed t-test. \* $P < 0.05$ , \*\* $P < 0.01$ , \*\*\* $P < 0.001$ .
