# Supplementary material for: Microplastics dampen the self-renewal of hematopoietic stem cells by disrupting the gut microbiota-hypoxanthine-Wnt axis
Source: PubMed Central journal article supplement (PMC10978833; doi:10.1038/s41421-024-00665-0), 2024-03-29
Supplement: 41421_2024_665_MOESM15_ESM.pdf [file 41421_2024_665_MOESM15_ESM.pdf]

# Supplementary Fig. S8

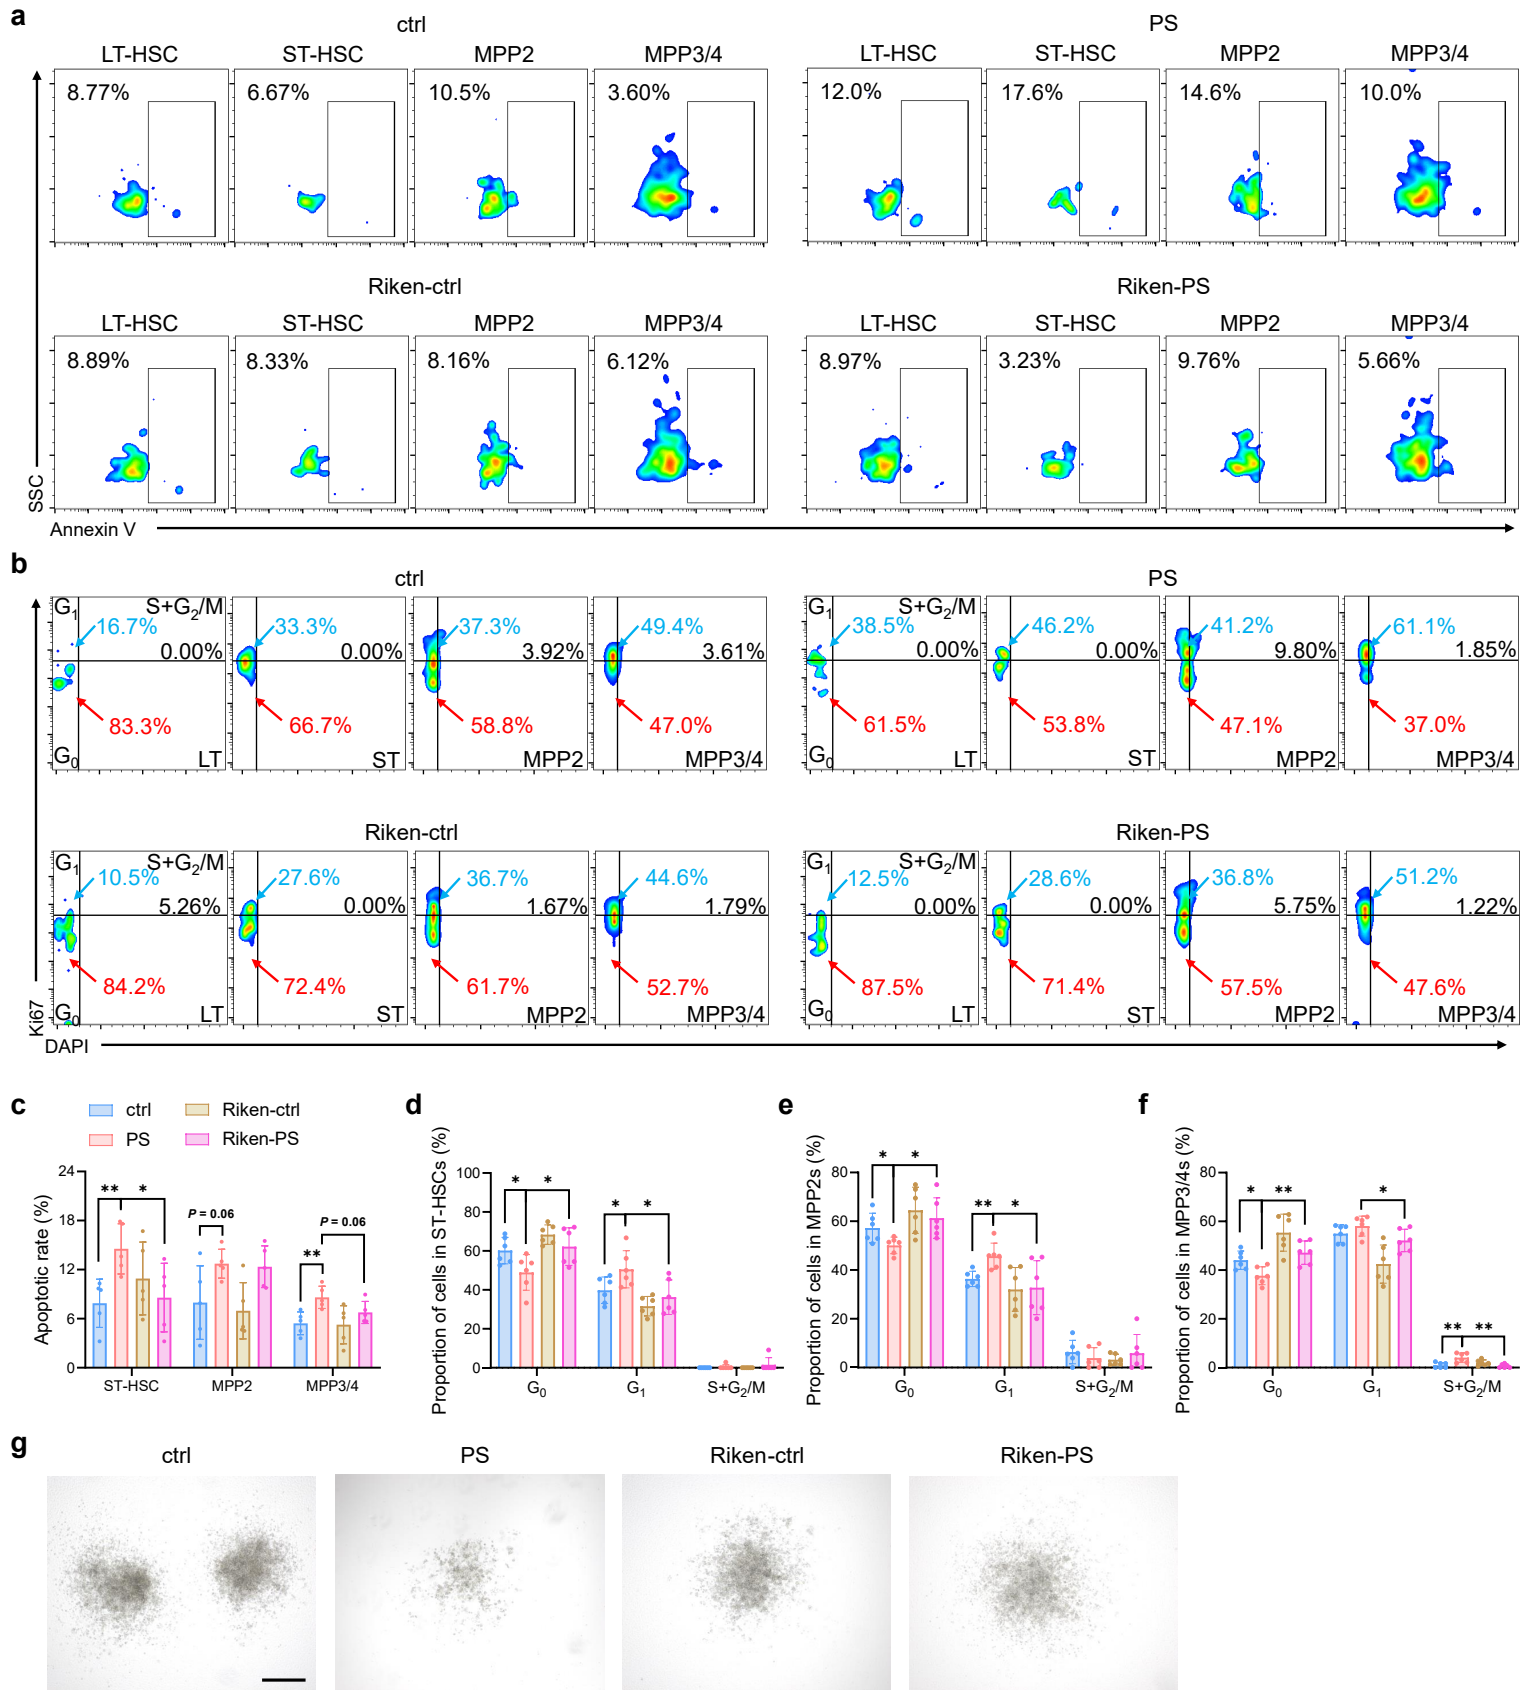

## Supplementary Fig. S8 | *Rikenellaceae* administration restored HSPC functions in the mice with microplastics.

**a-b**, Representative flow cytometry analysis of apoptosis (**a**) and cell cycle profiles (**b**) ( $n = 5$  per group). **c**, Apoptotic rate of HSPCs. **d-f**, FACS quantification of cell cycle in ST-HSCs (**d**), MPP2s (**e**) and MPP3/4s (**f**). **g**, Representative picture of colonies in ctrl, PS, Riken-ctrl and Riken-PS group. Error bars indicate SD, unpaired two-tailed t-test. \* $P < 0.05$ , \*\* $P < 0.01$ , \*\*\* $P < 0.001$ .
