# Supplementary material for: Microplastics dampen the self-renewal of hematopoietic stem cells by disrupting the gut microbiota-hypoxanthine-Wnt axis
Source: PubMed Central journal article supplement (PMC10978833; doi:10.1038/s41421-024-00665-0), 2024-03-29
Supplement: 41421_2024_665_MOESM16_ESM.pdf [file 41421_2024_665_MOESM16_ESM.pdf]

# Supplementary Fig. S9

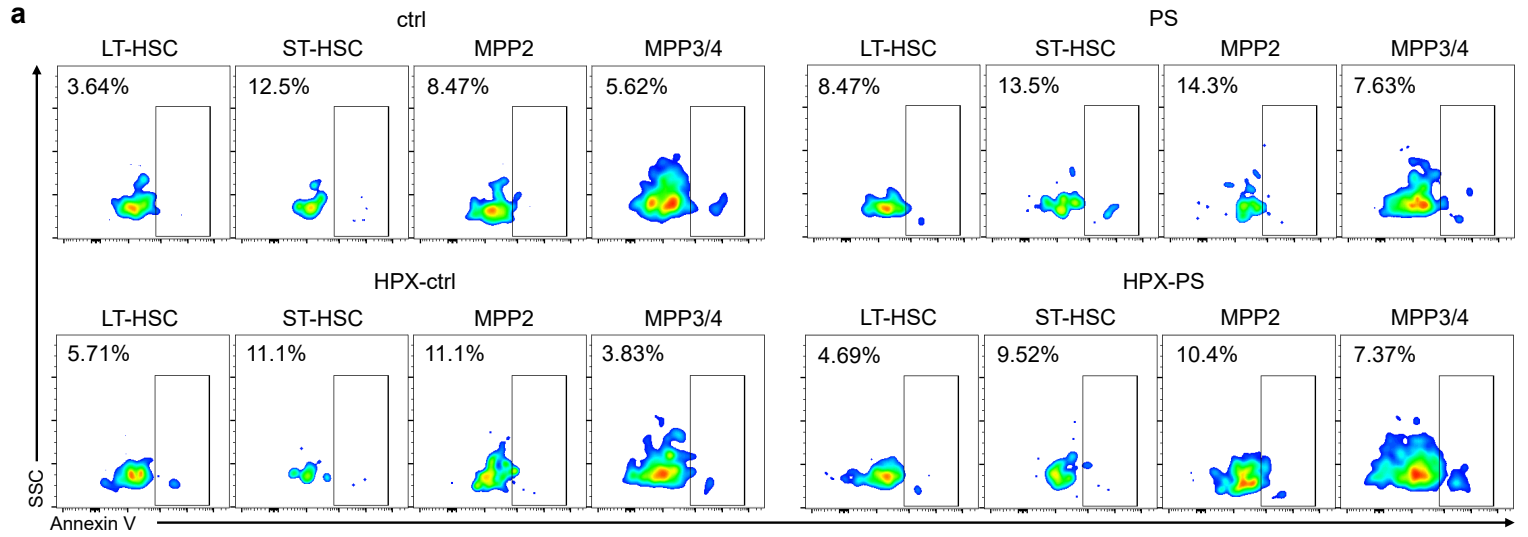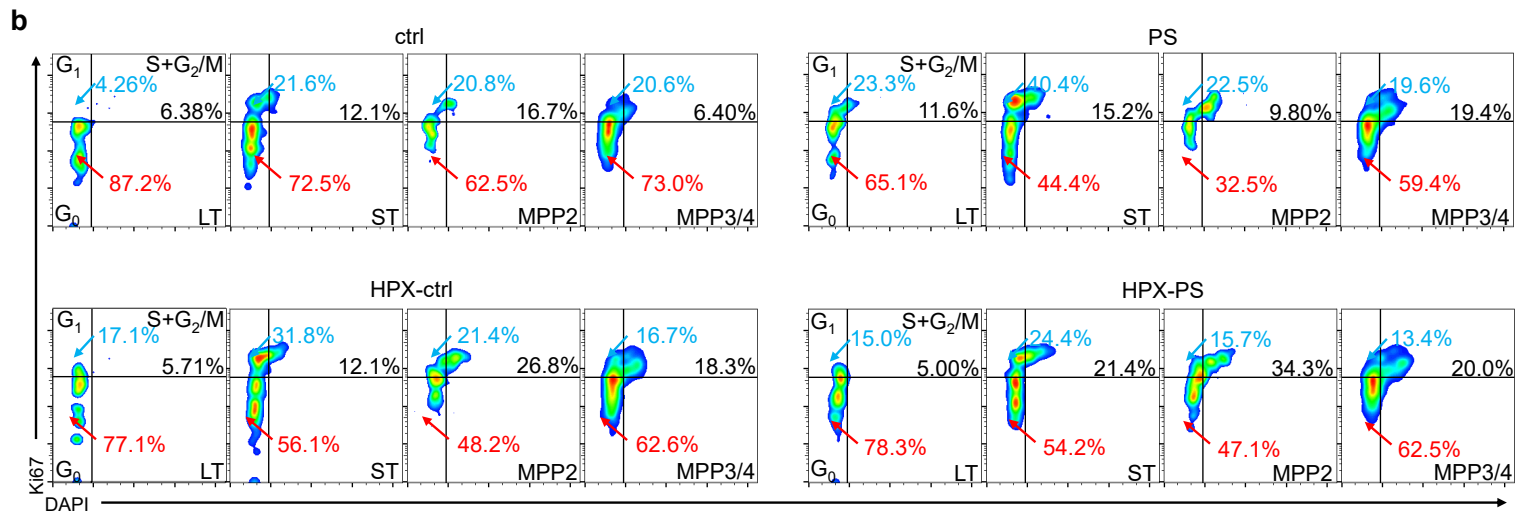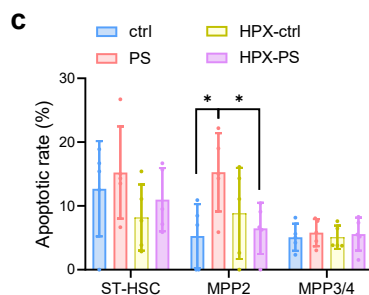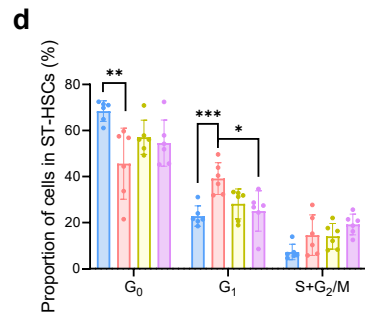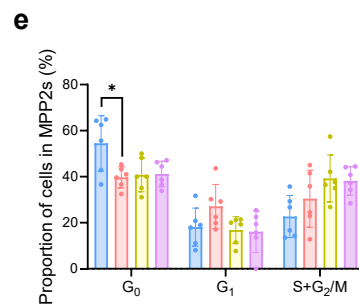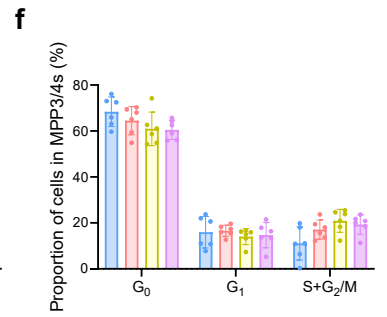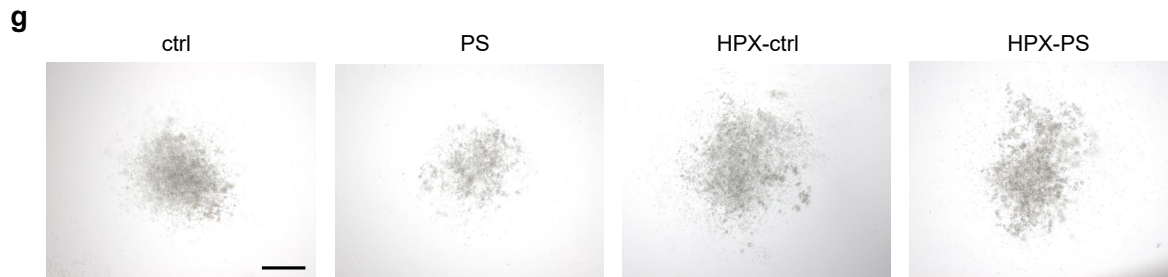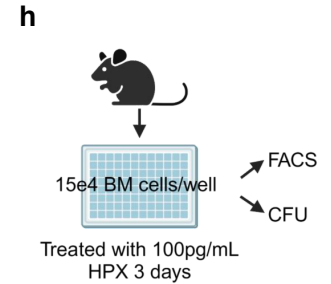

## Supplementary Fig. S9

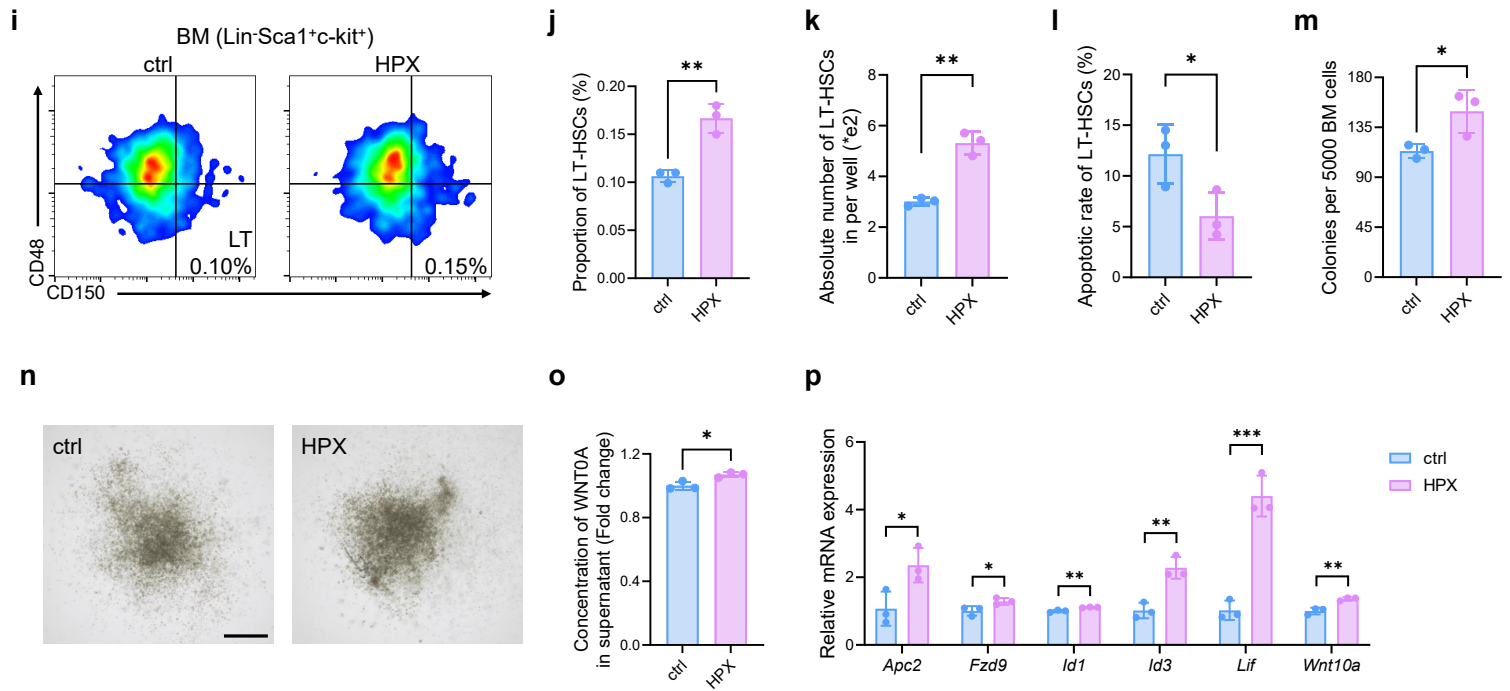

### Supplementary Fig. S9 | Hypoxanthine treatment partially mitigates the damage of HSPCs in the PS<sub>H</sub> mice.

**a-b**, Representative FACS images of apoptosis (**a**) and cell cycle profiles (**b**) ( $n = 5$  per group). **c**, Proportion of apoptosis in HSPCs. **d-f**, FACS analysis of cell cycle in ST-HSCs (**d**), MPP2s (**e**) and MPP3/4s (**f**). **g**, Representative images of colonies in ctrl, PS, HPX-ctrl and HPX-PS group. **h**, Schematic of the hypoxanthine culture in vitro to BM cells. **i-k**, Representative FACS images (**i**), proportion (**j**) and absolute number of cells (**k**) in mice. **l**, Apoptosis of LT-HSCs. **m-n**, Number of colonies formed by 5000 bone marrow cells (**m**) and representative picture of colonies (**n**). **o**, Concentration of WNT10A in the supernatant. **p**, Relative expression of genes in the Wnt signaling pathway. Error bars indicate SD, unpaired two-tailed t-test.  $*P < 0.05$ ,  $**P < 0.01$ ,  $***P < 0.001$ .
