# Supplementary material for: Microplastics dampen the self-renewal of hematopoietic stem cells by disrupting the gut microbiota-hypoxanthine-Wnt axis
Source: PubMed Central journal article supplement (PMC10978833; doi:10.1038/s41421-024-00665-0), 2024-03-29
Supplement: 41421_2024_665_MOESM17_ESM.pdf [file 41421_2024_665_MOESM17_ESM.pdf]

# Supplementary Fig. S10

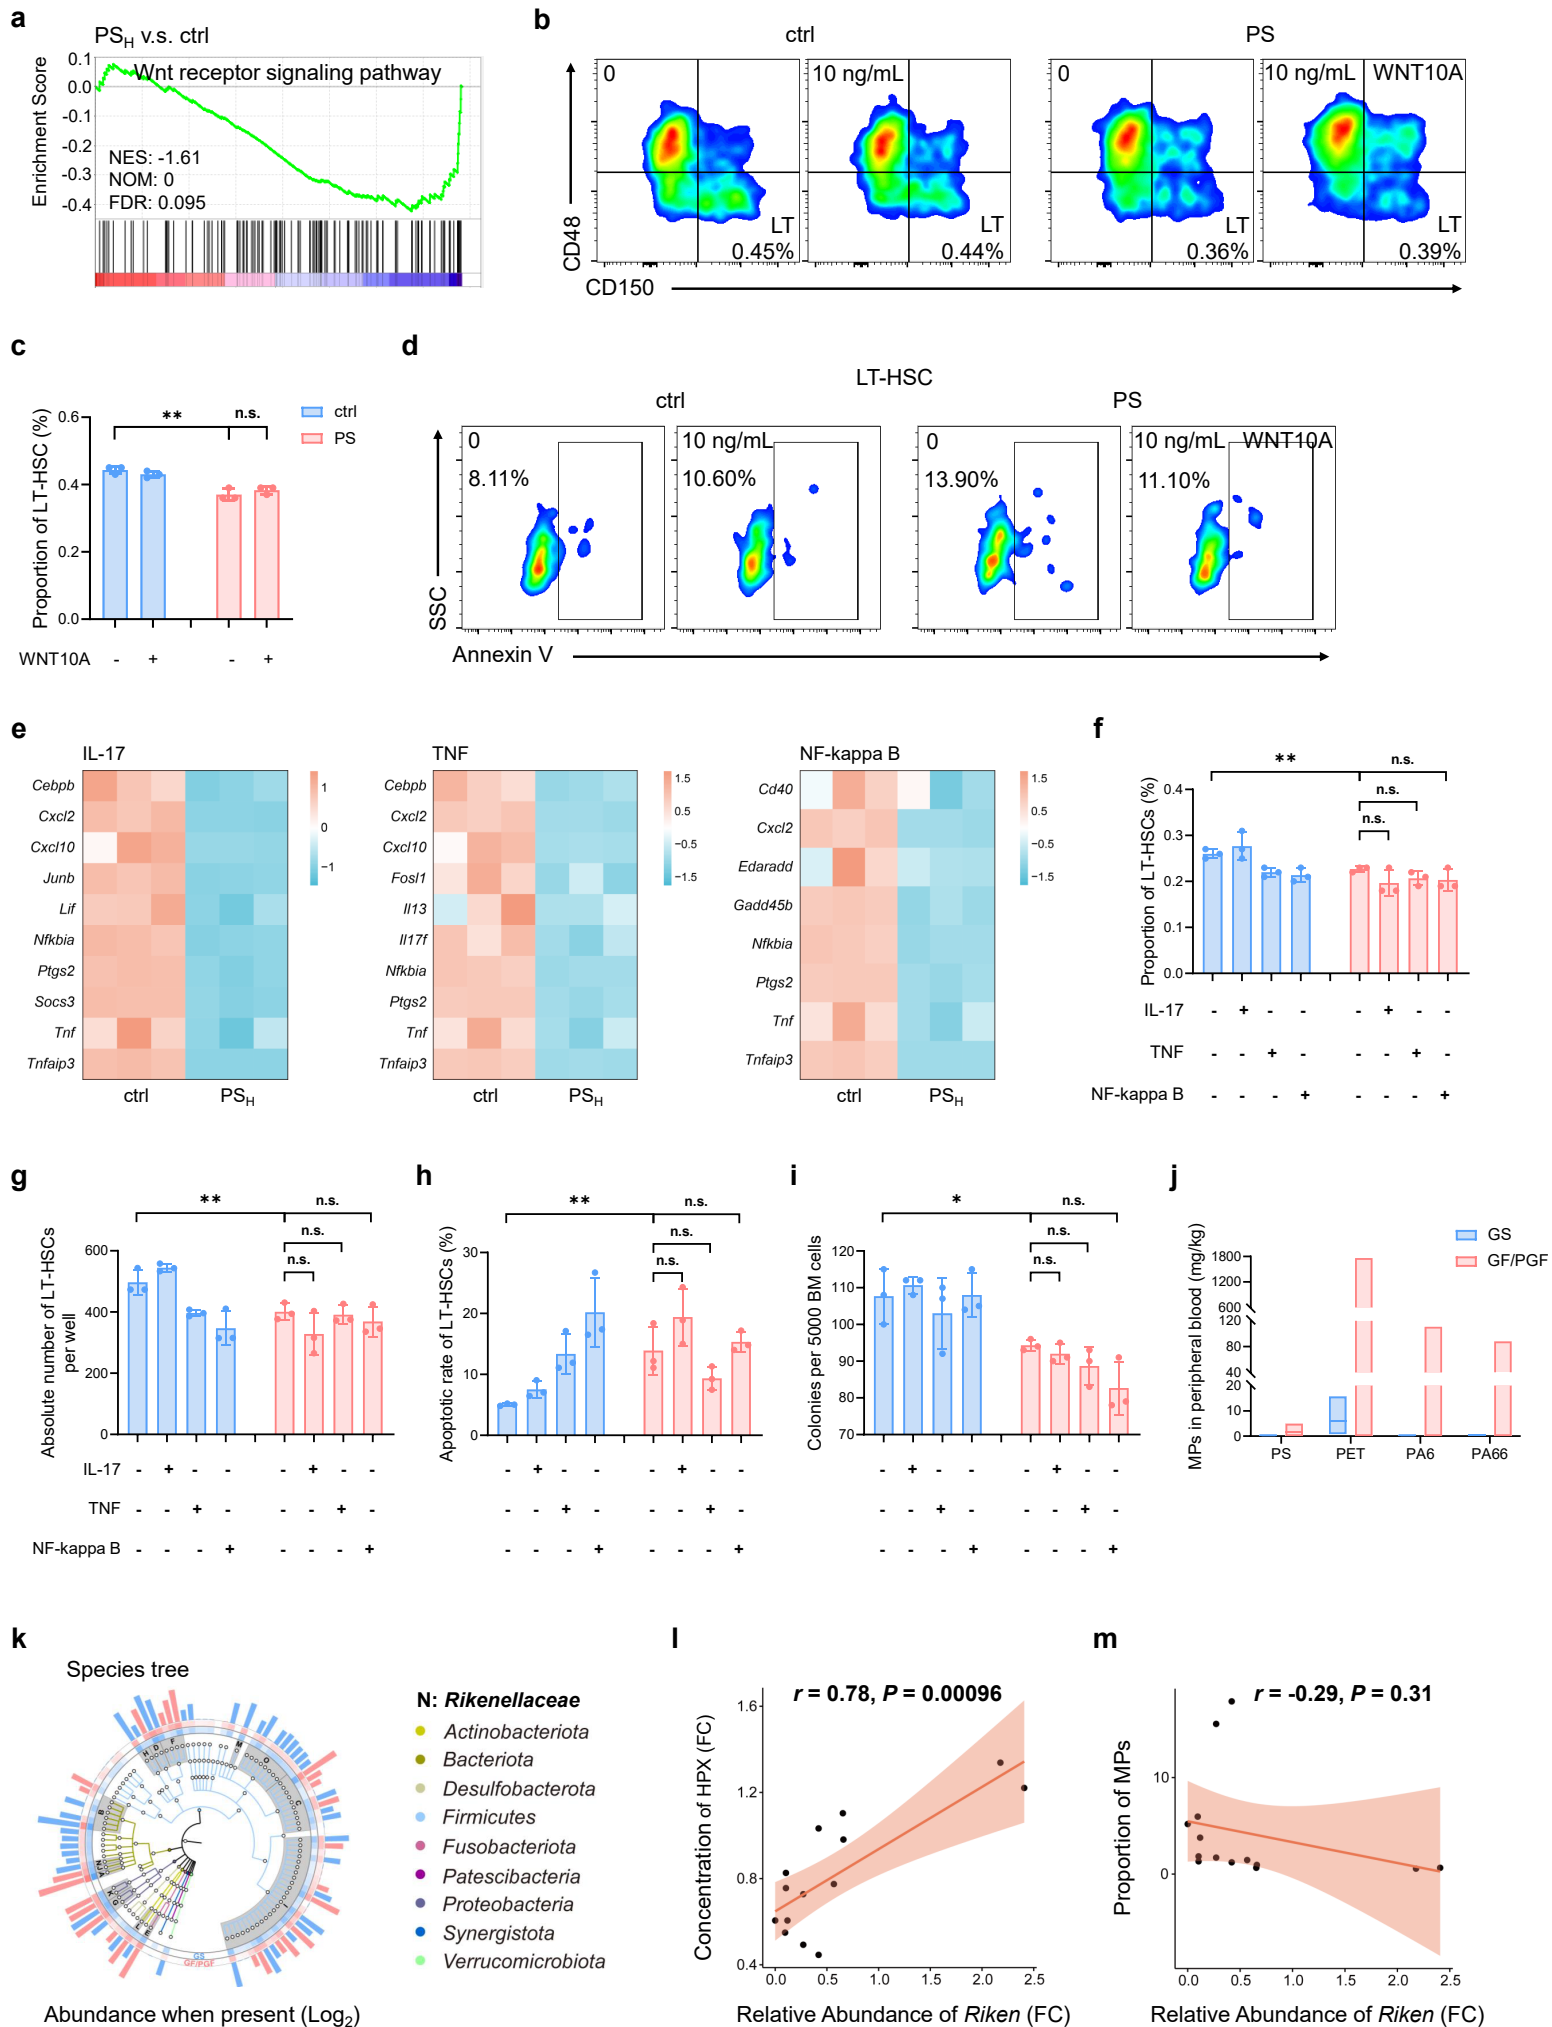

## Supplementary Fig. S10

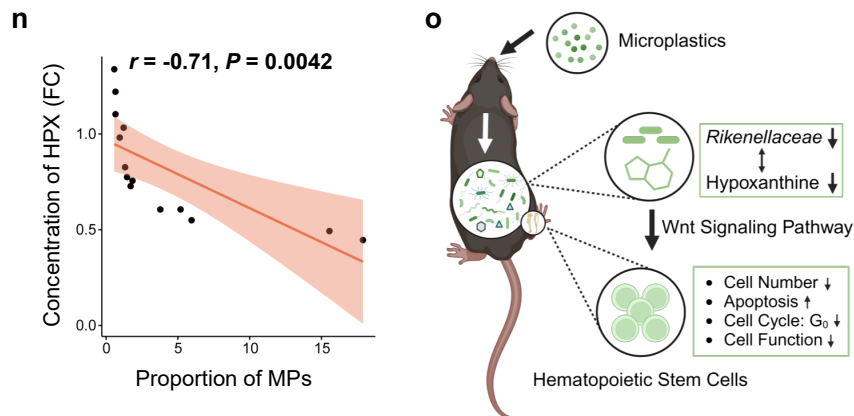

### Supplementary Fig. S10 | Wnt signaling pathway is beneficial to the recovery of HSCs function and microplastics play a detrimental role in HSC transplantation.

**a**, Gene set enrichment analysis (GSEA) in LT-HSCs from the PS<sub>H</sub> group v.s. the ctrl group for “Wnt receptor signaling pathway”. **b-c**, Representative flow cytometry images (**b**) and proportion of cells (**c**) during cell culture in vitro. **d**, Representative flow cytometry images of apoptosis. **e**, Relative expression of genes in the IL-17, TNF and NF-kappa B signaling pathways. **f-g**, Proportion (**f**) and absolute number (**g**) of LT-HSCs after being treated with IL-17, TNF or NF-kappa B. **h**, Apoptotic rate of LT-HSCs. **i**, Number of colonies formed by 5000 bone marrow cells. (n = 3 per group) **j**, Detection of microplastics in peripheral blood. **k**, Species tree in feces of donor provided BM cells. **l-n**, Correlation between relative abundance of *Rikenellaceae* and concentration of hypoxanthine in feces (**l**), relative abundance of *Rikenellaceae* and proportion of microplastics in feces (**m**) or concentration of hypoxanthine and proportion of microplastics in feces (**n**). The Pearson correlation coefficient (r) and empirical P value were also shown. **o**, Proposed schema of the microplastics mechanism to hematopoietic stem cells in mice (n = 7 per group). Error bars indicate SD, unpaired two-tailed t-test.  $**P < 0.01$ .
